# Supplementary material for: What about Dinner? Chemical and Microresidue Analysis Reveals the Function of Late Neolithic Ceramic Pans
Source: MDPI journal article supplement (doi:10.3390/molecules26113391), 2021-06-03
Supplement: s1 [file s1]

## What about dinner? Chemical and microresidual analysis reveal the function of the Late Neolithic ceramic pans

Jaromír Beneš, Valentina Todoroska, Kristýna Budilová, Jaromír Kovárník, Jaroslav Pavelka, Nevenka Atanasoska, Jiří Bumerl, Assunta Florenzano, Tereza Majerovičová, Václav Vondrovský<sup>6</sup>, Michaela Ptáková, Petr Bednář, Lukáš Richtera and Lukáš Kučera

**Figure S1:** Total ion current (TIC) chromatogram of sample KE4-2 (green line; inner edge - close upper part, baked layer) and KE4-5 (orange line; edge - the reference sample). List of identified compounds is shown in Supplement 1B.

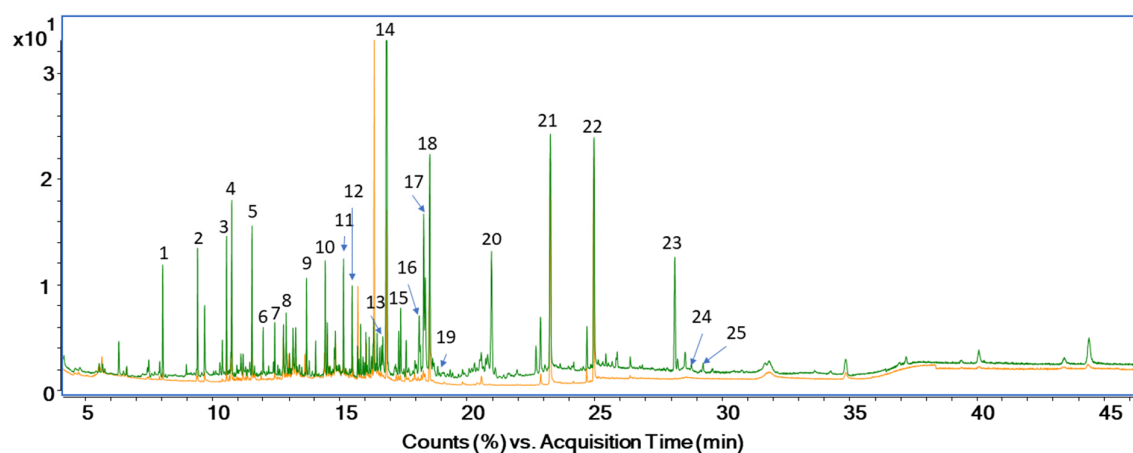

**Table S1:** Table of the most significant compound detected in sample KE4-2

| Peak # | RT<br>(min) | Compound                                  |
|--------|-------------|-------------------------------------------|
| 1      | 8.05        | Hexanoic acid, TMS derivative             |
| 2      | 9.42        | Heptanoic acid, TMS derivative            |
| 3      | 10.55       | Octanoic acid, TMS derivative             |
| 4      | 10.75       | Glycerol, 3TMS derivative                 |
| 5      | 11.54       | 7-Metyloctanoic acid, TMS derivative      |
| 6      | 11.98       | Pentanedioic acid, TMS derivative         |
| 7      | 12.44       | Decanoic acid, TMS derivative             |
| 8      | 12.89       | Hexanedioic acid, TMS derivative          |
| 9      | 13.69       | 3-Methyladipic acid, 2TMS derivative      |
| 10     | 14.43       | Suberic acid, 2TMS derivative             |
| 11     | 15.15       | Azelaic acid, 2TMS derivative             |
| 12     | 15.49       | Myristic acid, TMS derivative             |
| 13     | 16.65       | 18-norabietane                            |
| 14     | 16.84       | Palmitic acid, TMS derivative             |
| 15     | 17.38       | Heptadecanoic acid, TMS derivative        |
| 16     | 18.11       | 3,7-Dimethyloctanoic acid, TMS derivative |
| 17     | 18.28       | Oleic acid, TMS derivative                |
| 18     | 18.53       | Stearic acid, TMS derivative              |
| 19     | 18.64       | Retene                                    |
| 20     | 20.96       | Sebatic acid, 2TMS derivative             |
| 21     | 23.26       | 1-Monopaltmitin, 2TMS derivative          |
| 22     | 24.97       | Glycerol monostearate, 2TMS derivative    |
| 23     | 28.15       | Cholesterol, TMS derivative               |
| 24     | 28.80       | Cholesta-3,5-dien-7-one                   |
| 25     | 29.26       | Cholest-4-en-3-one                        |
